# Supplementary material for: Improving Peripherally Inserted Central Catheter (PICC) care on a Trauma and Orthopaedics ward
Source: PubMed Central journal article supplement — BMJ Qual Improv Rep. 2013 Feb 27;2(1):u464.w354. doi: 10.1136/bmjquality.u464.w354 (PMC4652731; doi:10.1136/bmjquality.u464.w354), 2013-02-27
Supplement: bmjqir-2-u464-w354-s1.pdf [file bmjqir-2-u464-w354-s1.pdf]

|                                       | Staff competency in using PICCs* | Staff confidence levels in using PICCs** |
|---------------------------------------|----------------------------------|------------------------------------------|
| Nurses on T&O ward (n=8)              | 0%                               | 65%                                      |
| Junior doctors at the hospital (n=30) | 6%                               | 38%                                      |

Table 1. Staff competency and confidence in PICC care

\* assessed by a multiple choice question test; result presented as a percentage correct answers

\*\* self-assessment by staff on a scale of 1 (0% confidence) to 5 (100% confidence)

|                              | Staff competency in using PICCs* |               |                      | Staff confidence levels in using PICCs** |               |                      |
|------------------------------|----------------------------------|---------------|----------------------|------------------------------------------|---------------|----------------------|
|                              | Pre-teaching                     | Post-teaching | Absolute Improvement | Pre-teaching                             | Post-teaching | Absolute Improvement |
| Junior doctors at DGH (n=30) | 6%                               | 70%           | 64%                  | 38%                                      | 66%           | 28%                  |
| Nurses on T&O ward (n=8)     | 0%                               | 38%           | 38%                  | 65%                                      | 80%           | 15%                  |

Table 2. Staff competency and confidence in PICC care pre- and post-teaching session

\* assessed by a multiple choice question test; result presented as a percentage correct answers

\*\* self-assessment by staff on a scale of 1 (0% confidence) to 5 (100% confidence)
